# Supplementary material
Source: MDPI journal article supplement (https://www.mdpi.com/2312-7481/8/5/54)
Supplement: s1 [file s1]

# High Drug Capacity Doxorubicin-Loaded Iron Oxide Nanocomposites for Cancer Therapy

Ekaterina Kovrigina, Alexey Chubarov\* and Elena Dmitrienko\*

Institute of Chemical Biology and Fundamental Medicine, SB RAS 630090 Novosibirsk, Russia;  
kutseykin@gmail.com (S.K.); silnik@niboch.nsc.ru (V.S.)

\* Correspondence: chubarovalesha@mail.ru (A.C.); [elena.dmitrienko@niboch.nsc.ru](mailto:elena.dmitrienko@niboch.nsc.ru) (E.V.); Tel.: +7-913-763-1420 (A.C.); +7-913-904-17-42 (E.V.)

The dynamic light scattering (DLS) measurements were carried out on a Malvern Zetasizer Nano device (Malvern Instruments, Worcestershire, UK) in deionized water ( $\sim 300 \mu\text{g/mL}$  concentration).

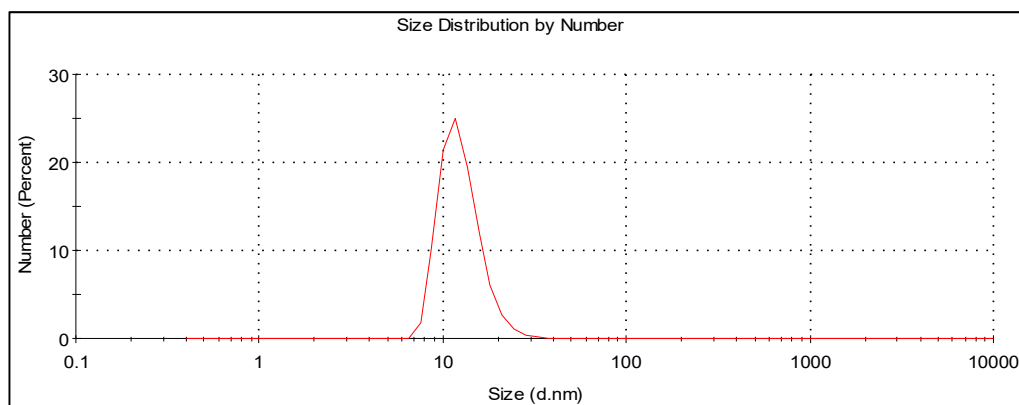

**Figure S1.** DLS size distribution data for MNP without coating. The particle size by DLS is  $15.6 \pm 2.2 \text{ nm}$  ( $\text{PDI} = 0.296 \pm 0.003$ ).

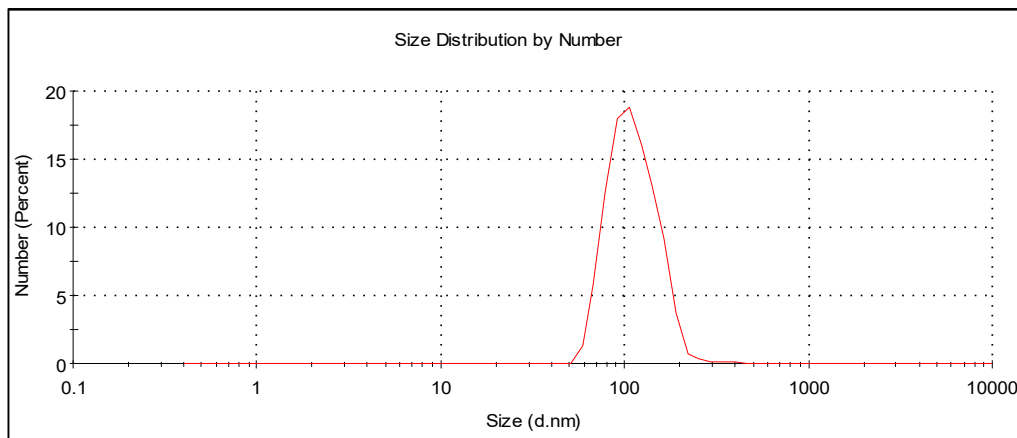

**Figure S2.** DLS size distribution (Number) of MNP\_Tw20. The particle size was  $258 \pm 4 \text{ nm}$  ( $\text{PDI} = 0.44 \pm 0.01$ ).

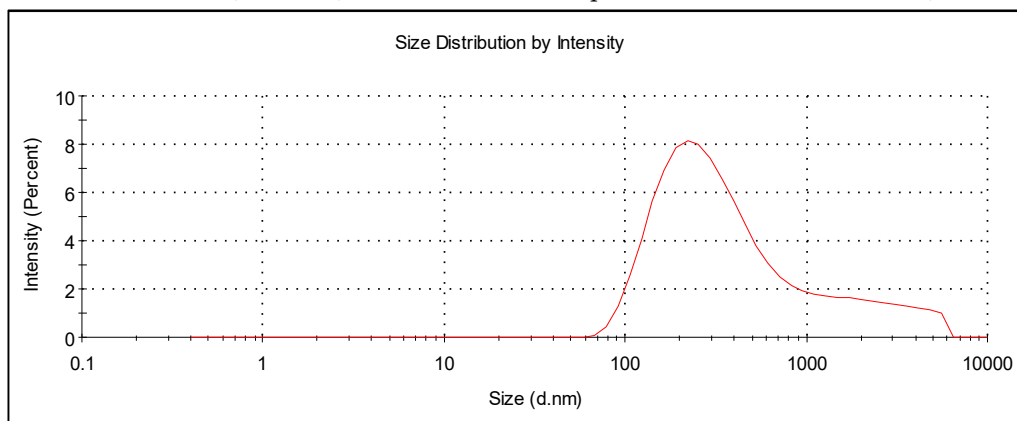

**Figure S3.** DLS size distribution (Intensity) of MNP\_Tw20. The particle size was  $711 \pm 53 \text{ nm}$ .

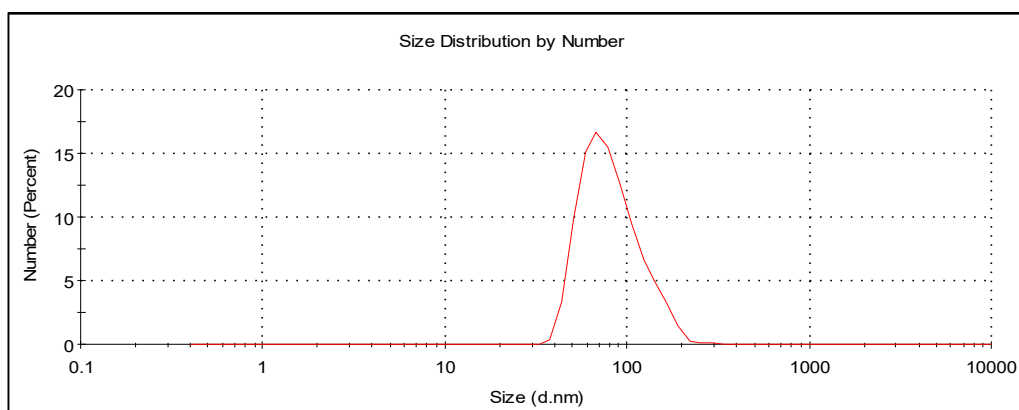

**Figure S4.** DLS size distribution (Number) of MNP\_Tw80. The particle size was  $233 \pm 2$  nm (PDI =  $0.256 \pm 0.007$ ).

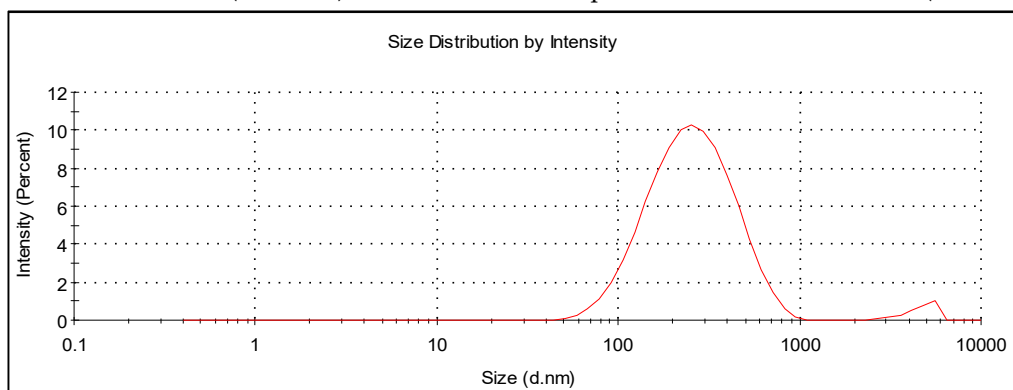

**Figure S5.** DLS size distribution (Intensity) of MNP\_Tw80. The intensity particle was  $403 \pm 48$  nm.

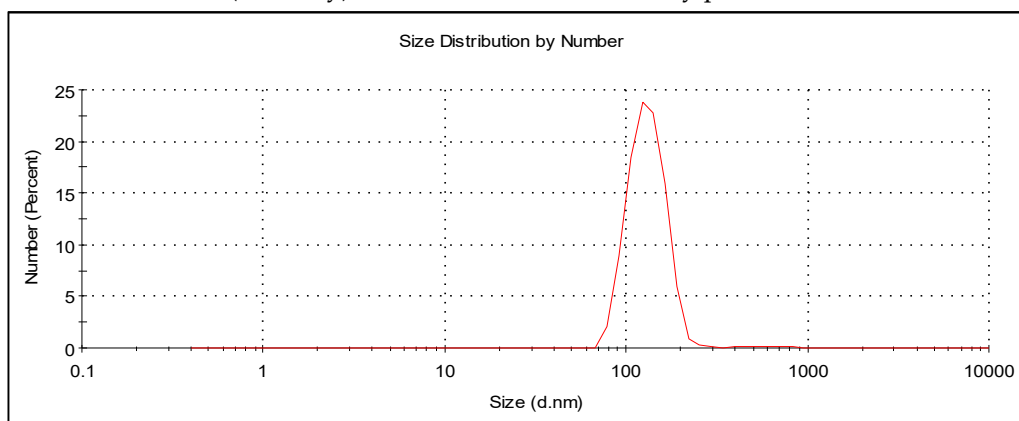

**Figure S6.** DLS size distribution (Number) of MNP\_PEG 2000. The particle size was  $196 \pm 15$  nm (PDI =  $0.50 \pm 0.03$ ).

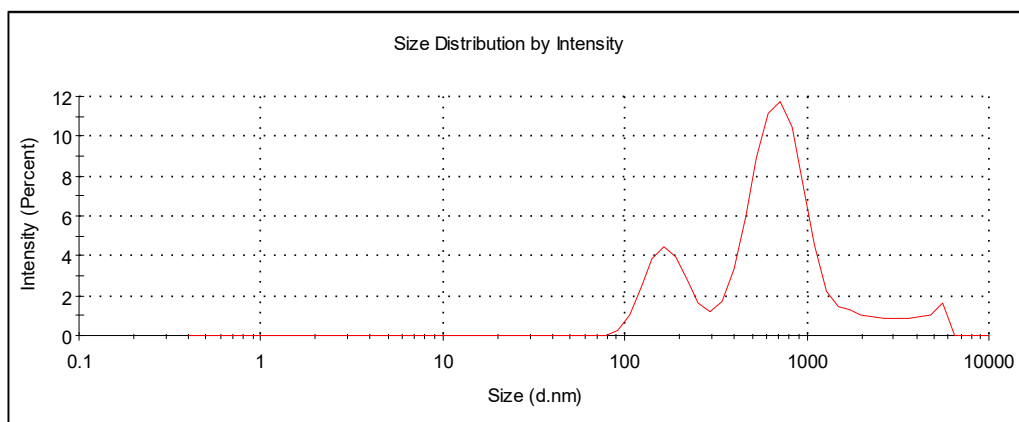

**Figure S7.** DLS size distribution (Intensity) of MNP\_PEG 2000. The intensity particle was  $711 \pm 112$  nm.

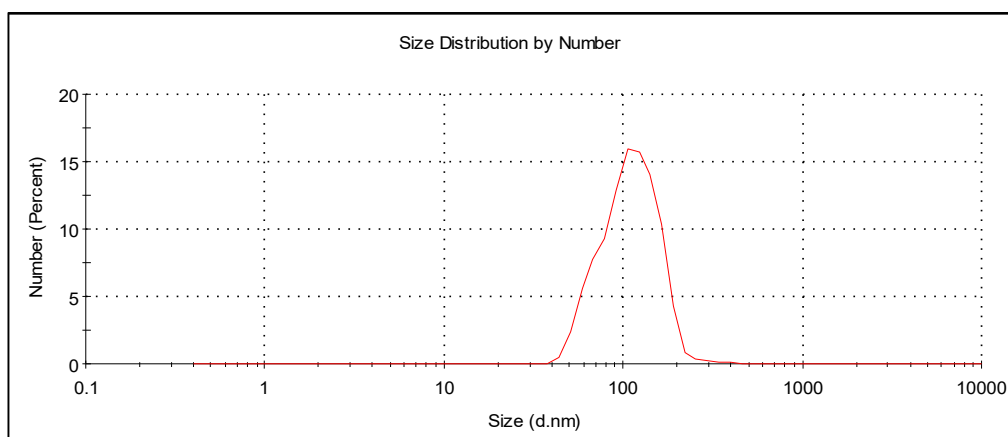

**Figure S8.** DLS size distribution (Number) of MNP\_OA. The particle size was  $112 \pm 19$  nm (PDI =  $0.172 \pm 0.009$ ).

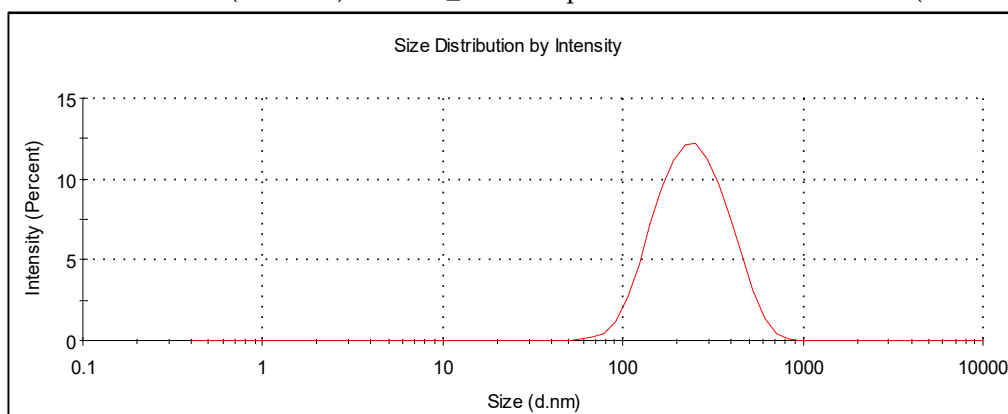

**Figure S9.** DLS size distribution (Intensity) of MNP\_OA. The intensity particle was  $264 \pm 9$  nm.

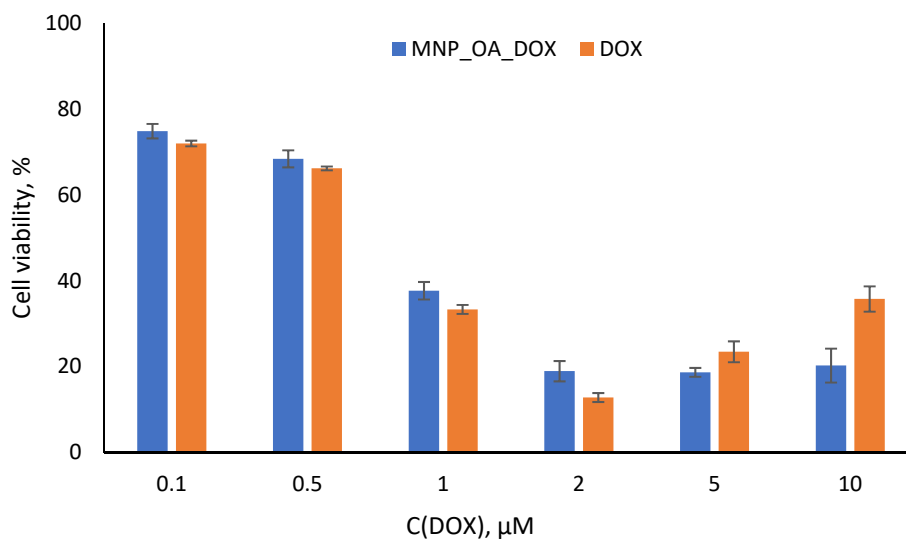

**Figure S10.** Cell viability studies of MNP\_OA\_DOX using MTT assay. A549 cell line was incubated for 48 h with MNPs loaded at various concentrations of MNP\_OA\_DOX and DOX.

**Table S1.** Hydrodynamic diameter (nm) for MNP\_OA for 48 h under various buffer conditions

| Conditions                | 0.1 h        | 1 h          | 24 h         | 48 h         |
|---------------------------|--------------|--------------|--------------|--------------|
| Deionized water (Milli-Q) | $132 \pm 4$  | $121 \pm 9$  | $127 \pm 5$  | $111 \pm 10$ |
| Cell medium DMEM          | $106 \pm 12$ | $112 \pm 14$ | $120 \pm 13$ | $107 \pm 7$  |
| Acetic buffer pH 5        | $135 \pm 16$ | $119 \pm 13$ | $164 \pm 12$ | $128 \pm 10$ |
| Acetic buffer pH 3        | $116 \pm 15$ | $137 \pm 29$ | $128 \pm 7$  | $136 \pm 9$  |

**Table S2.** PDI for MNP\_OA for 48 h under various buffer conditions

| Conditions                | 0.1 h         | 1 h           | 24 h           | 48 h          |
|---------------------------|---------------|---------------|----------------|---------------|
| Deionized water (Milli-Q) | 0.189 ± 0.009 | 0.329 ± 0.035 | 0.166 ± 0.015  | 0.154 ± 0.012 |
| Cell medium DMEM          | 0.321 ± 0.021 | 0.300 ± 0.031 | 0.311 ± 0.025  | 0.265 ± 0.003 |
| Acetic buffer pH 5        | 0.298 ± 0.022 | 0.301 ± 0.011 | 0.2868 ± 0.024 | 0.254 ± 0.004 |
| Acetic buffer pH 3        | 0.328 ± 0.023 | 0.336 ± 0.029 | 0.332 ± 0.033  | 0.288 ± 0.012 |

**Table S3.** Hydrodynamic diameter (nm) for MNP\_OA\_DOX for 48 h under various buffer conditions

| Conditions                | 0.1 h    | 1 h      | 24 h     | 48 h     |
|---------------------------|----------|----------|----------|----------|
| Deionized water (Milli-Q) | 201 ± 51 | 150 ± 16 | 218 ± 29 | 223 ± 11 |
| Cell medium DMEM          | 249 ± 31 | 225 ± 29 | 239 ± 38 | 266 ± 26 |
| Acetic buffer pH 5        | 178 ± 30 | 176 ± 19 | 165 ± 12 | 168 ± 16 |
| Acetic buffer pH 3        | 161 ± 8  | 123 ± 32 | 115 ± 10 | 171 ± 5  |

**Table S4.** PDI for MNP\_OA\_DOX for 48 h under various buffer conditions

| Conditions                | 0.1 h         | 1 h           | 24 h          | 48 h          |
|---------------------------|---------------|---------------|---------------|---------------|
| Deionized water (Milli-Q) | 0.216 ± 0.030 | 0.377 ± 0.026 | 0.347 ± 0.044 | 0.267 ± 0.006 |
| Cell medium DMEM          | 0.269 ± 0.045 | 0.291 ± 0.019 | 0.302 ± 0.048 | 0.277 ± 0.038 |
| Acetic buffer pH 5        | 0.384 ± 0.038 | 0.307 ± 0.008 | 0.453 ± 0.021 | 0.237 ± 0.001 |
| Acetic buffer pH 3        | 0.284 ± 0.029 | 0.266 ± 0.018 | 0.349 ± 0.008 | 0.363 ± 0.002 |

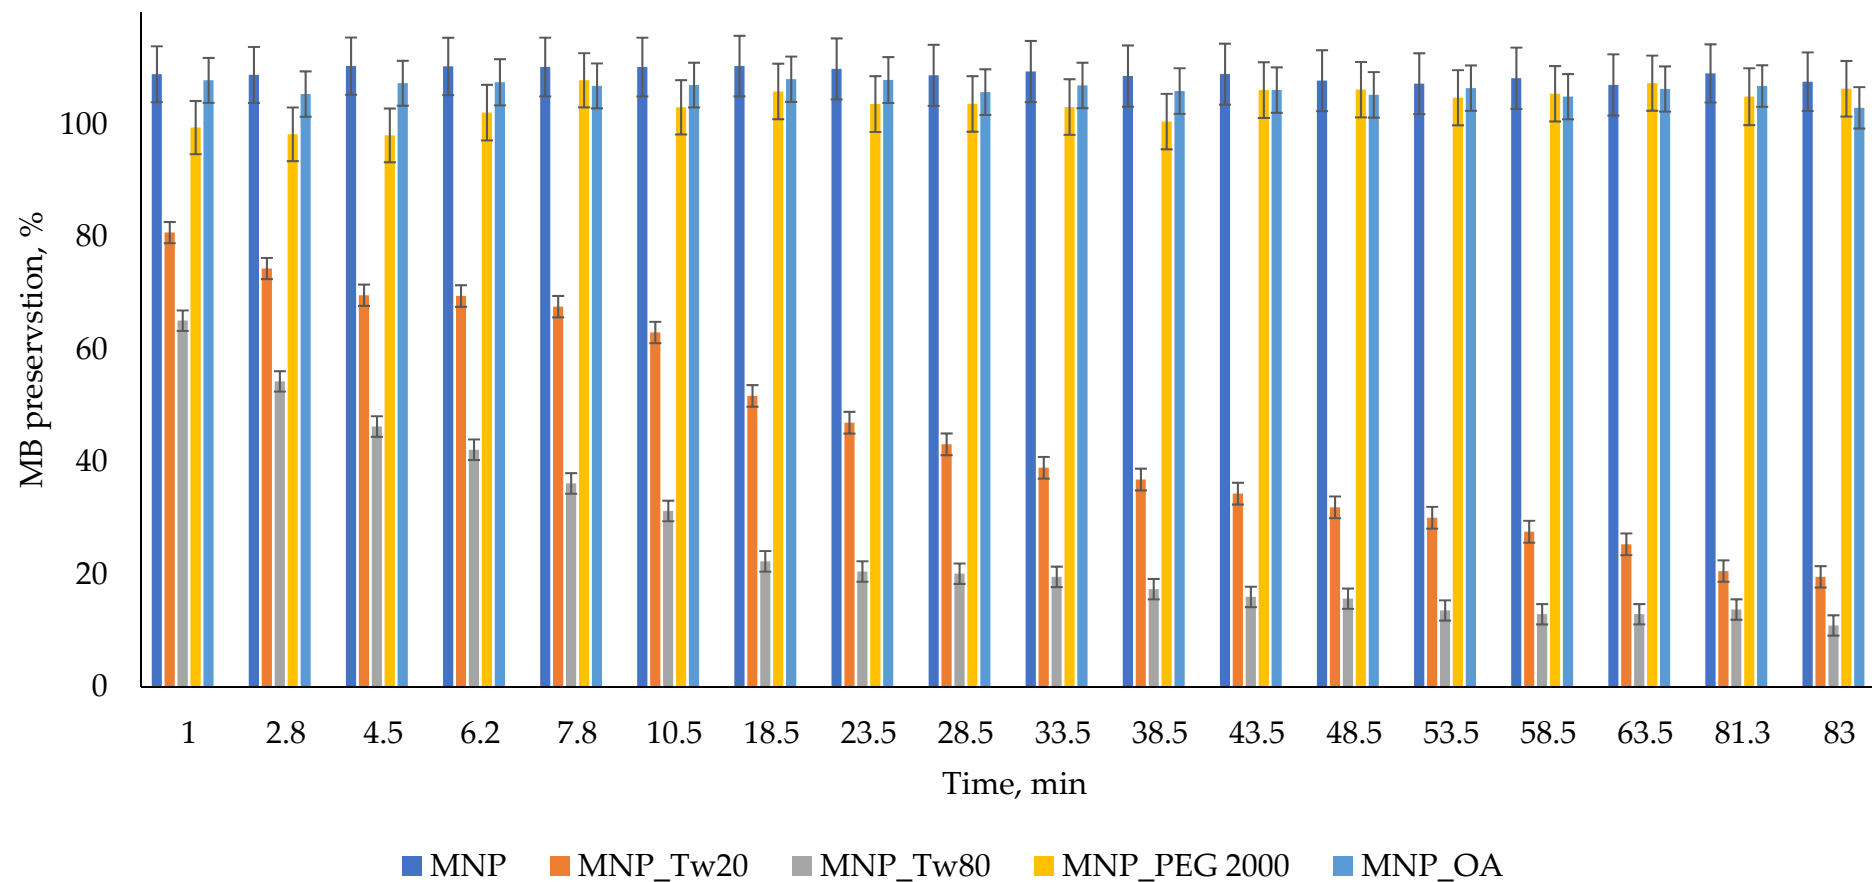

**Figure S11.** Methylene blue (MB) discoloration assay using  $\text{H}_2\text{O}_2$  as an oxidizing agent. The MB preservation % was calculated from the absorbance decrease at 665 nm using a Clariostar plate reader (BMG Labtech, Germany). This graph shows the degradation of MB for all types of nanoparticles at a concentration of 75  $\mu\text{g}/\text{ml}$  over the entire period. The percentage of dye binding was subtracted from the percentage of degradation of MB in the reaction with MNP and  $\text{H}_2\text{O}_2$ .
